# Supplementary material for: Mercury methylation and methylmercury demethylation in boreal lake sediment with legacy sulphate pollution
Source: Royal Society of Chemistry journal article supplement (doi:10.1039/d2em00064d), 2022-01-01
Supplement: d2em00064d1.pdf [file d2em00064d1.pdf]

1 Electronic Supplementary Information (ESI)

2 to

3 Mercury methylation and methylmercury demethylation in boreal  
4 lake sediment with legacy sulphate pollution

5

6 Haiyong Huang<sup>a</sup>, Vaughn Mangal<sup>a</sup>, Michael D. Rennie<sup>b</sup>, Huan Tong<sup>a,c</sup>, Myrna J. Simpson<sup>a,c</sup> and  
7 Carl P.J. Mitchell<sup>a\*</sup>

8 <sup>a</sup> Department of Physical and Environmental Sciences, University of Toronto Scarborough,  
9 Ontario, Canada

10 <sup>b</sup> Department of Biology, Lakehead University, Thunder Bay, Ontario, Canada

11 <sup>c</sup> Environmental NMR Centre, University of Toronto Scarborough, Ontario, Canada

12

13

14 \*Corresponding author: [carl.mitchell@utoronto.ca](mailto:carl.mitchell@utoronto.ca)

15

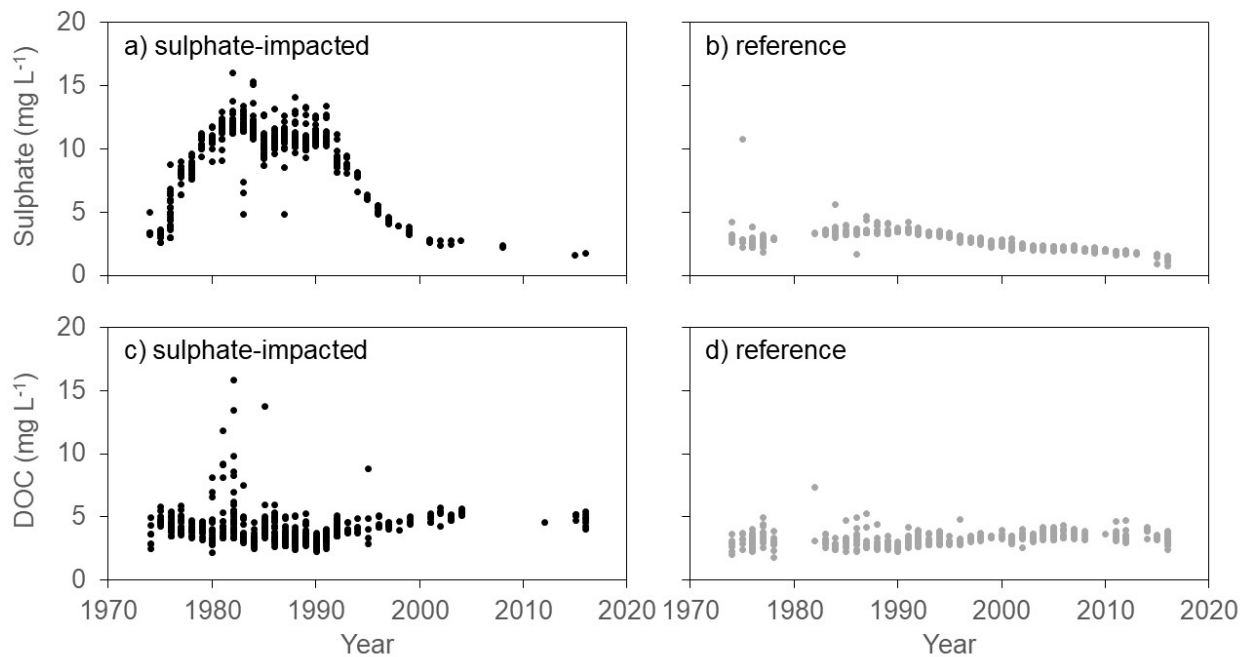

16

17 Figure S1. Time series analysis of concentrations of sulphate and DOC in the sulphate-impacted  
 18 lake (a and c, black) and the reference lake (b and d, grey). Each dot represents a measurement in  
 19 the epilimnetic water. Data of the sulphate-impacted lake came from the monitoring programs of  
 20 the historical experimental manipulations; data of the reference lake came from an IISD-ELA  
 21 Long-Term Ecological Research monitoring program.

22

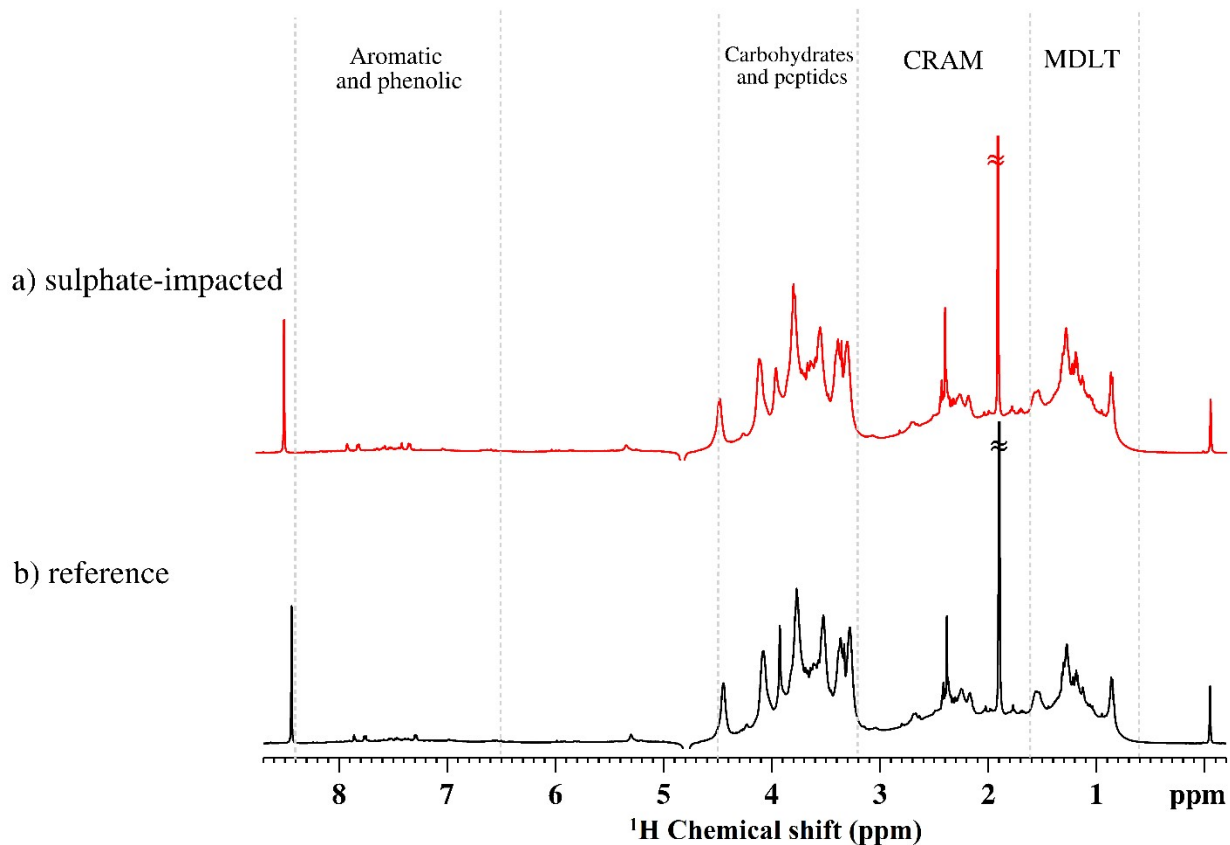

23

24 Figure S2. Analysis of a) sulphate-impacted and b) reference lake water DOM compositions  
 25 using NMR spectroscopy. <sup>1</sup>H NMR spectra integrated into four main classes of DOM  
 26 components based on the chemical shift values: MDLT (materials derived from linear  
 27 terpenoids), 0.6–1.6 ppm; CRAM (carboxyl-rich alicyclic molecules), 1.6–3.2 ppm;  
 28 carbohydrates and peptides, 3.2–4.5 ppm; and aromatic and phenolic components, 6.5–8.4 ppm.

29

30

31

32

33

34

35

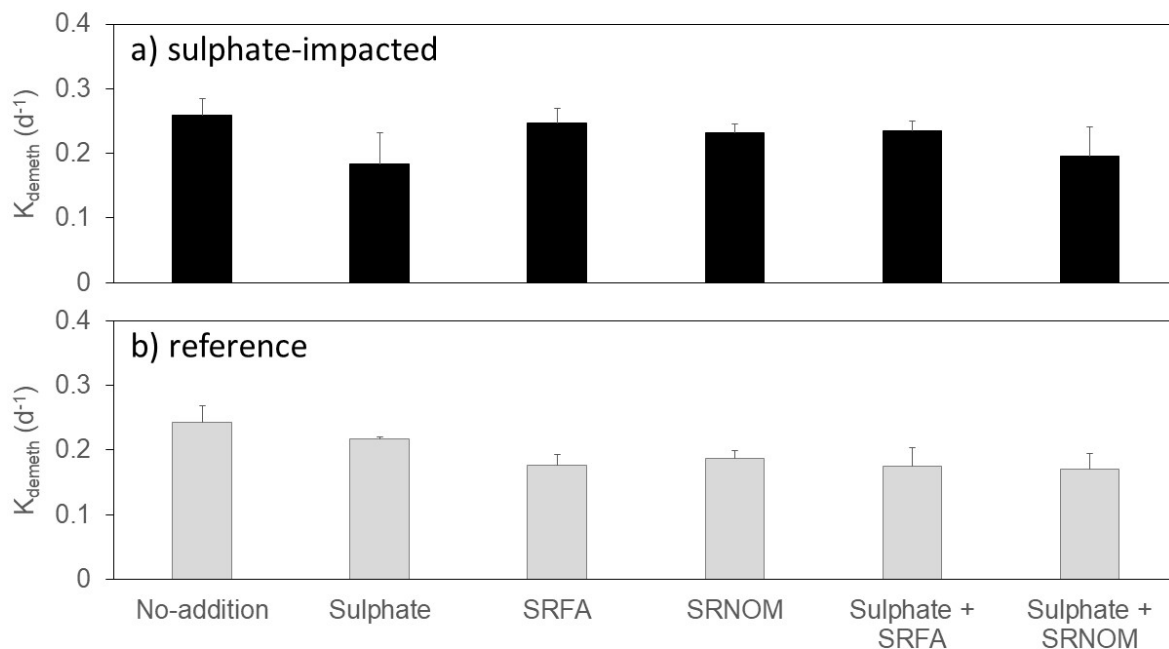

36

Figu

37 re S3.  $K_{\text{demeth}}$  in a) sulphate-impacted and b) reference lake sediment with singular additions of  
 38 sulphate ( $\text{Na}_2\text{SO}_4$ ,  $300\mu\text{M}$ ), SRFA (low sulphur content,  $600\mu\text{M}$  carbon), SRNOM (high sulphur  
 39 content,  $600\mu\text{M}$  carbon) and combined additions of sulphate and SRFA or sulphate and SRNOM  
 40 as compared with no-addition control. Error bars represent one standard error of replicate (n=3)  
 41 experiments.

42

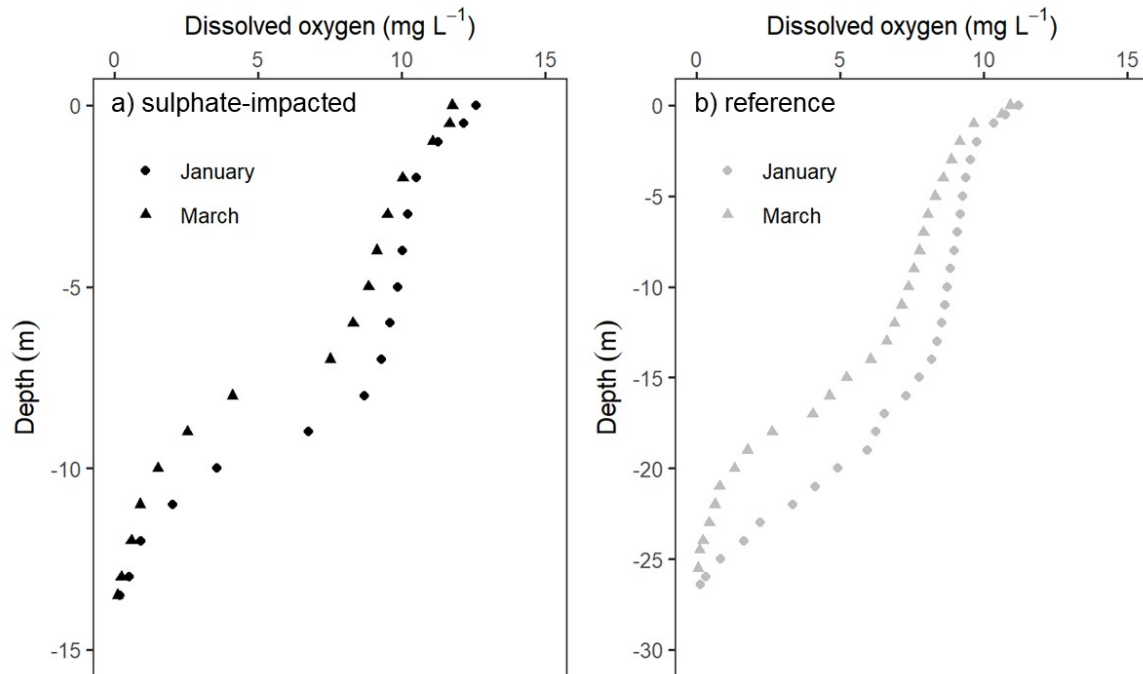

43

44 Figure S4. Depth profiles of dissolved oxygen concentrations during winter 2018 in a) sulphate-  
 45 impacted and b) reference lake water. All data are from the IISD-ELA Long-Term Ecological  
 46 Research monitoring program.

47
